# Supplementary material
Source: PubMed Central journal article supplement (PMC5846685)
Supplement: NIHMS913328-supplement.pdf [file NIHMS913328-supplement.pdf]

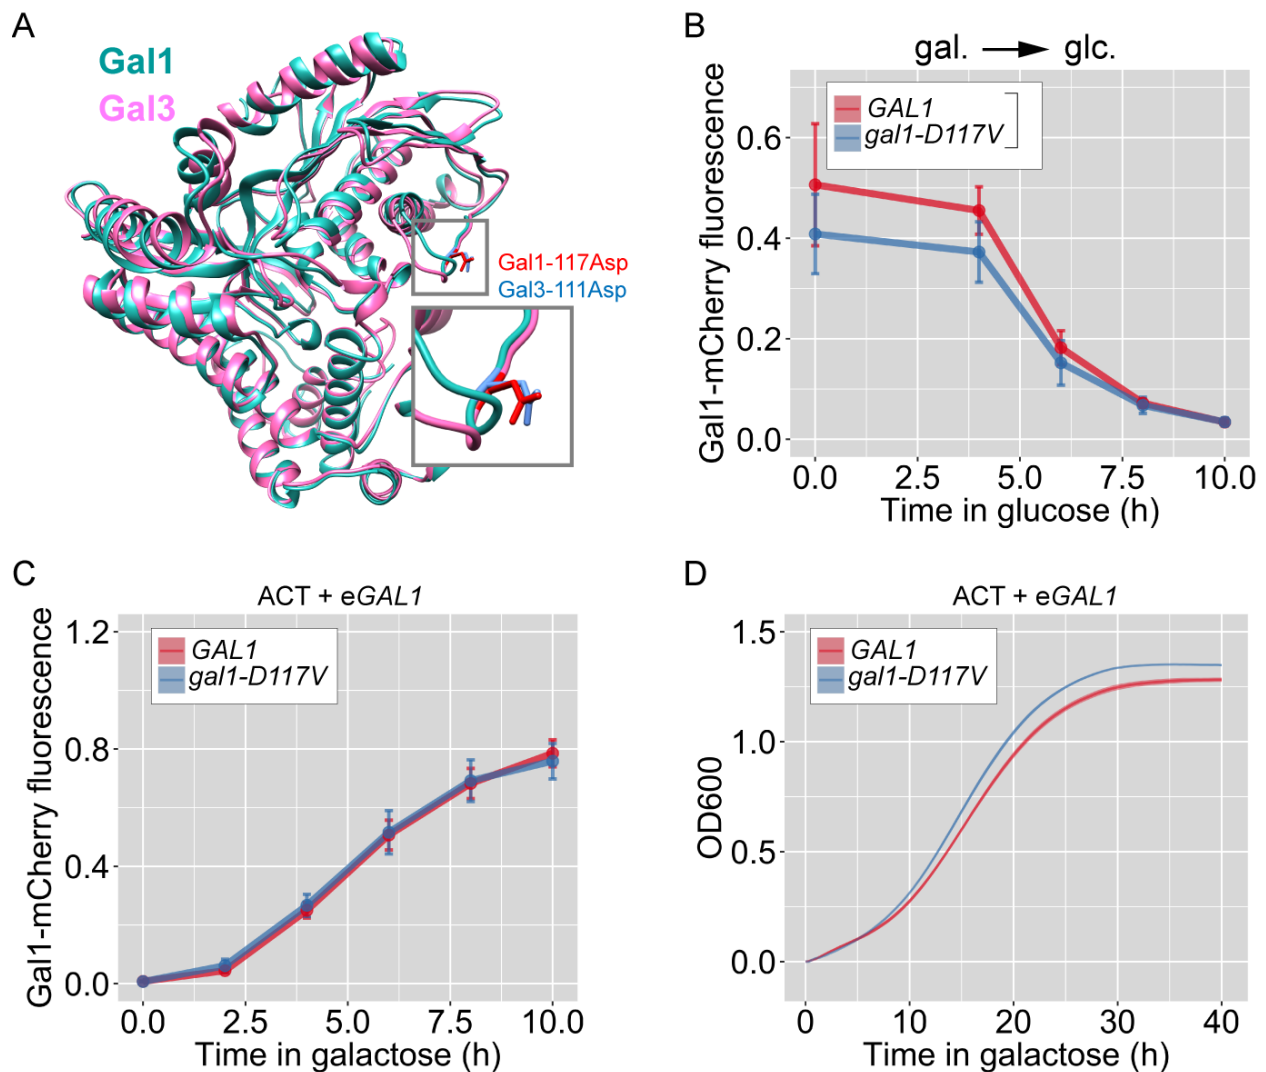

**Figure S1. Characterization of the *gal1-D117V* mutant. Related to Figure 2.** **A.** Structural superposition of the Gal1 (blue) and Gal3 (pink) crystal structures. Inset: Gal1-117Asp and the structurally equivalent Gal3-111Asp. **B.** Wild-type and *gal1-D117V* strains were shifted from galactose to glucose and Gal1-mCherry fluorescence, normalized to CFP, was measured over time. **C** and **D.** Expression of Gal1-mCherry relative to CFP (**C**) and OD<sub>600</sub> (**D**) over time upon shift from glucose to galactose in wild-type and *gal1-D117V* mutants containing ectopically expressed *GAL1* (*eGAL1*). Error bars represent the SEM from  $\geq 3$  biological replicates, depicted as bars (**B** and **C**) or envelope (**D**). The yeast strains and the number of biological replicates for all experiments are listed in Table S1 and S2, respectively.

A

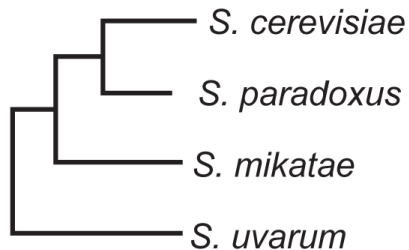

B

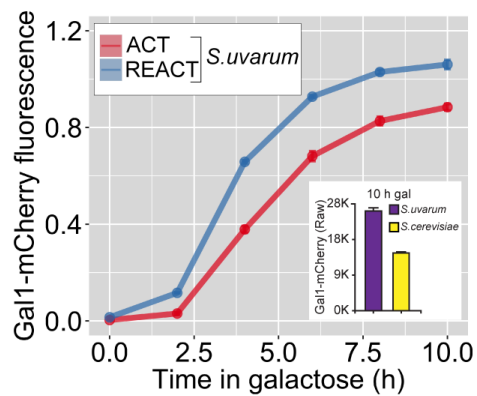

C

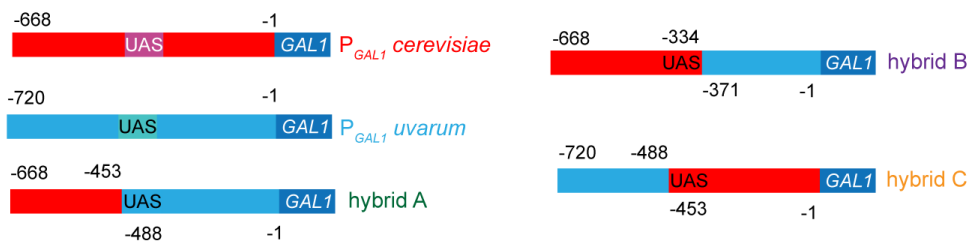

D

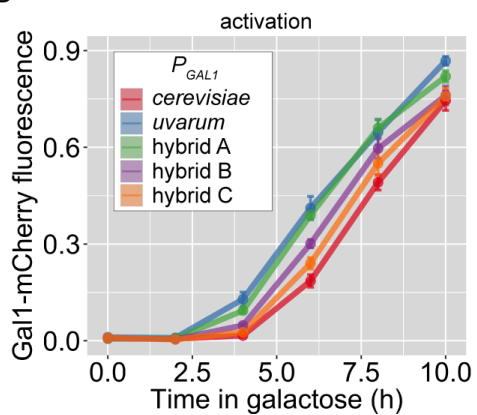

E

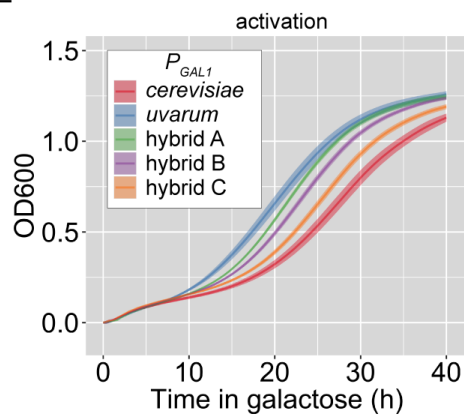

F

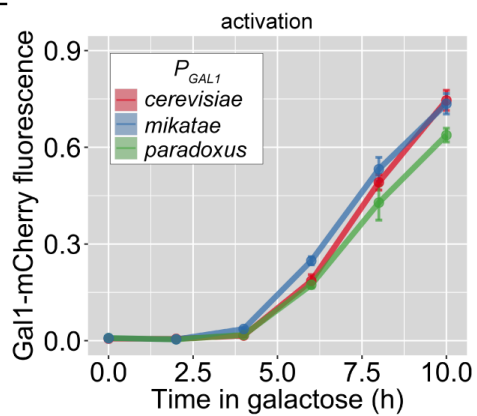

G

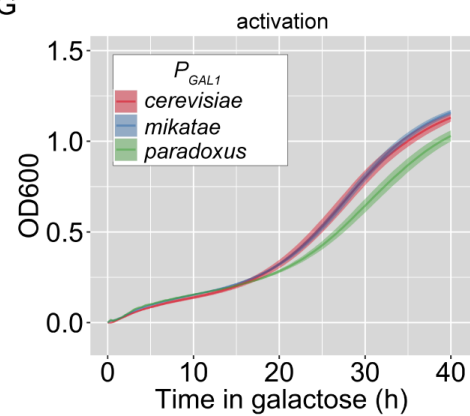

**Figure S2. GAL1 promoter driven adaptation to galactose. Related to Figure 3. A.**

Dendrogram depicting the evolutionary relationship between different species in the *Saccharomyces* genus [S1]. **B.** *S. uvarum* cells harboring *GAL1-mCherry* and *P<sub>TDH1</sub>-VENUS* were shifted from glucose to galactose (ACT) or grown overnight in galactose, shifted to glucose for 18 hours and then shifted to galactose (REACT). Gal1-mCherry fluorescence was measured relative to constitutively expressed Venus by flow cytometry. Inset: the raw Gal1-mCherry levels between *S. cerevisiae* and *S. uvarum* after 10 hours in galactose. **C.** Schematic of promoter hybrids between *P<sub>GAL1</sub> cerevisiae* and *P<sub>GAL1</sub> uvarum* that were inserted in place of the native *GAL1* promoter in *S. cerevisiae*. The *UAS<sub>GAL4</sub>* in *P<sub>GAL1</sub>* for both *S. cerevisiae* and *S. uvarum* is shown for reference. Gal1-mCherry fluorescence relative to CFP (**D**) and OD<sub>600</sub> (**E**) in strains with the hybrid promoters described in **C**, upon shifting cells from glucose to galactose. **F-G.** The effect of substituting *P<sub>GAL1</sub>* from *S. mikatae* and *S. paradoxus* in place of native *P<sub>GAL1</sub>* in *S. cerevisiae* on Gal1-mCherry expression (**F**) and OD<sub>600</sub> (**G**) in upon shift from glucose to galactose. Error bars represent SEM from  $\geq 3$  biological replicates for Gal1-mCherry fluorescence and  $\geq 9$  biological replicates for OD<sub>600</sub> measurements. The yeast strains and the number of biological replicates for all experiments are listed in Table S1 and S2, respectively.

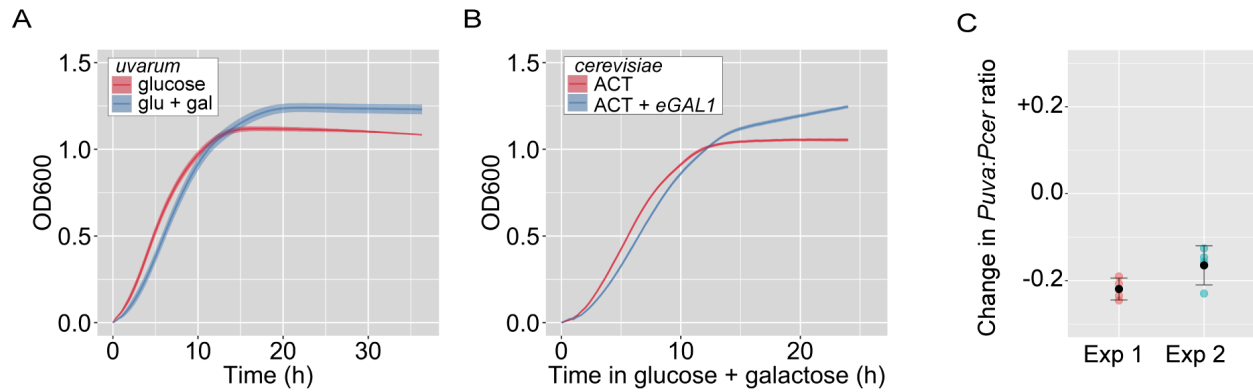

**Figure S3. Basal *GAL1* expression leads to growth defects in mixed sugars. Related to Figure 3.** OD<sub>600</sub> was measured every 20 minutes. **A** and **B**. Wild-type *S. uvarum* cells (**A**) or *S. cerevisiae* cells with and without ectopic *GAL1* (**B**) were shifted from glucose to either a mixture of 1% glucose + 1% galactose or to glucose. Growth curves represent the average and the envelopes represent the SEM from  $\geq 3$  biological replicates. **C**. Competitive growth assay between *S. cerevisiae* cells containing native  $P_{GAL1}cerevisiae$  and  $P_{GAL1}uvarum$  in 1% glucose + 1% galactose. Venus fluorophore was constitutively expressed in either  $P_{GAL1}cerevisiae$  cells (Exp1) or  $P_{GAL1}uvarum$  cells (Exp2). Four independent biological replicates were performed for each experiment. Cells were mixed 1:1 *cerevisiae*:*uvarum* promoters. The fractions of cells expressing Venus were measured over time by flow cytometry. Plotted is the change in the ratio  $P_{GAL1}uvarum$  to  $P_{GAL1}cerevisiae$ , normalized to the initial ratio, after 36 h growth. The Malthusian selection coefficient for the strain having the *uvarum*  $P_{GAL1}$  was  $-0.005 \pm 0.0007$  in experiment 1 and  $-0.007 \pm 0.0006$  in experiment 2 [S2]. The yeast strains and the number of biological replicates for all experiments are listed in Table S1 and S2, respectively.

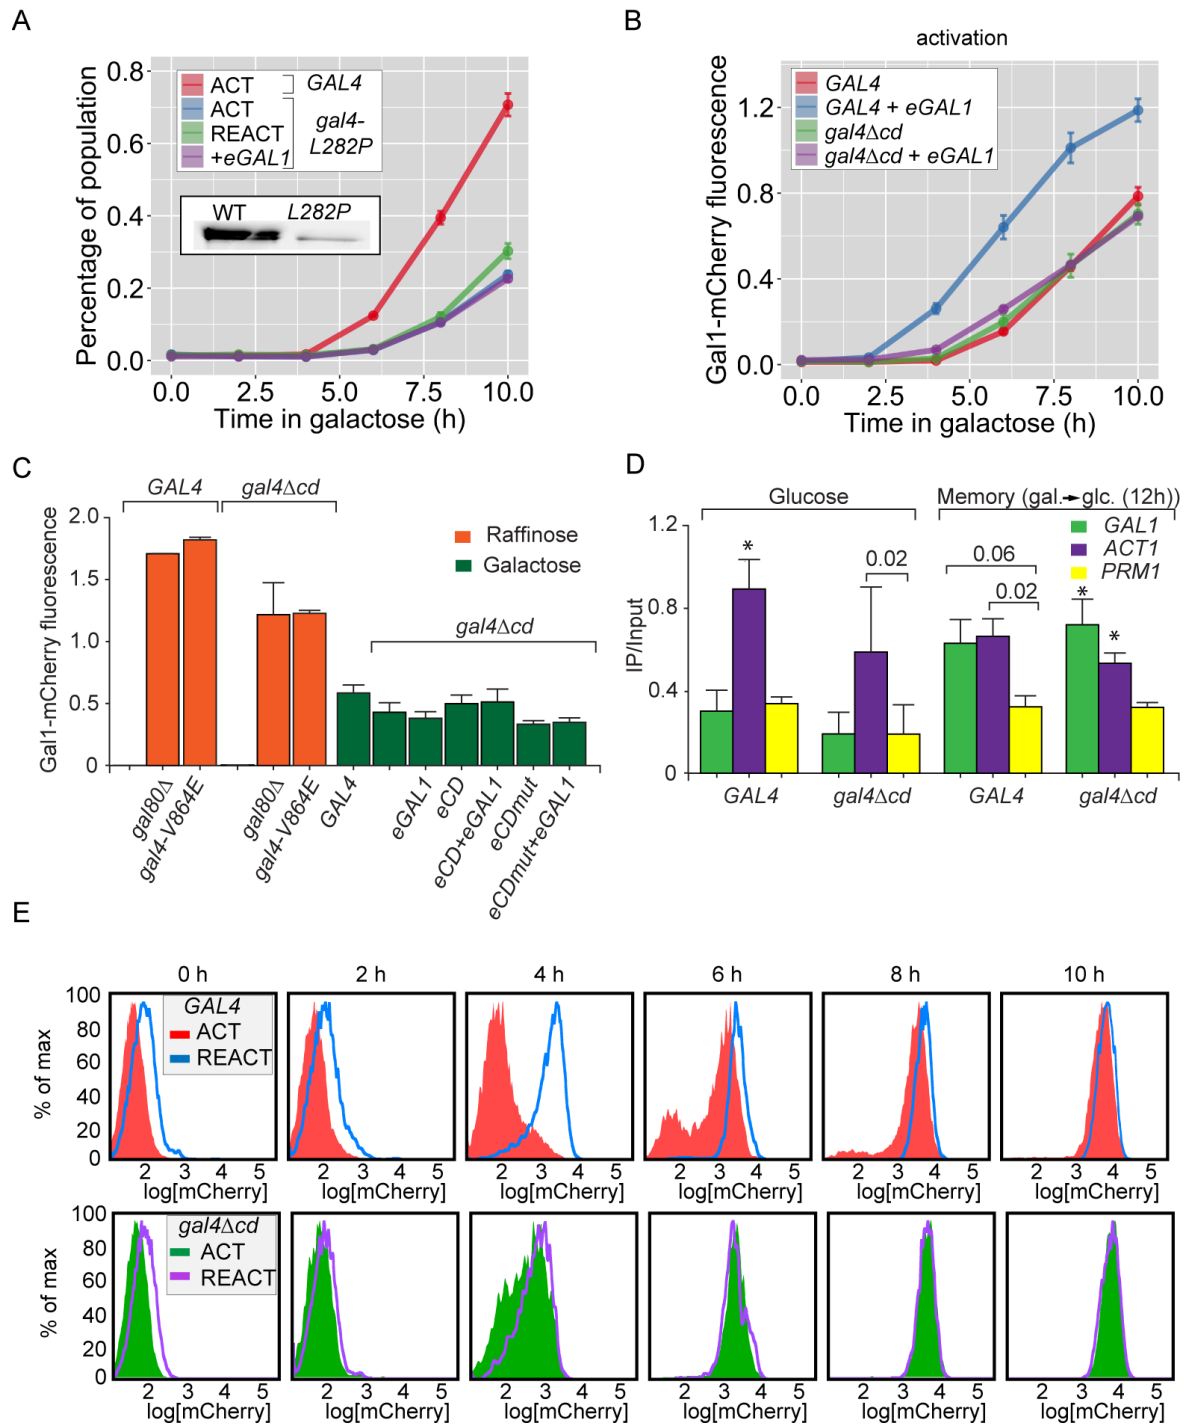

**Figure S4. Gal4 central domain regulates potentiation and stochasticity downstream of Gal1 and chromatin changes during memory. Related to Figure 4 and 5. A, B & E.** Naïve cells (ACT), naïve cells with ectopically expressed *GAL1* (*eGAL1*), or cells that were grown in galactose overnight and shifted to glucose for 12 hours (REACT), were shifted to galactose and Gal1-

mCherry fluorescence was measured relative to CFP control. **A.** The *gal4-L282P* mutant strain; Inset: immunoblot for immunoprecipitated Gal4 and *gal4-L282P* mutant. **B.** Wild-type and *gal4Δcd* mutant with and without ectopic *GAL1*. **C.** Steady state Gal1-mCherry levels relative to CFP in strains derived from *GAL4* cells and *gal4ΔCD* mutant cells, grown in raffinose and galactose. **D.** CHIP against H3K4me2 in wild-type and *gal4Δcd* mutants under long-term repressed (glucose) and memory (gal. → glc., 12h) conditions. Recovery of the *GAL1* promoter, positive control locus (*ACT1*) and negative control locus (*PRM1*), were quantified relative to input by real time quantitative PCR. \*  $p \leq 0.05$  (Student's t-test) relative to the CHIP enrichment of *PRM1*. **E.** Overlap of concatenated histograms of Gal1-mCherry between ACT and REACT, for wild-type cells (Top panel) or *gal4Δcd* mutant (Bottom panel). Error bars represent SEM from  $\geq 3$  biological replicates. The yeast strains and the number of biological replicates for all experiments are listed in Table S1 and S2, respectively.

A

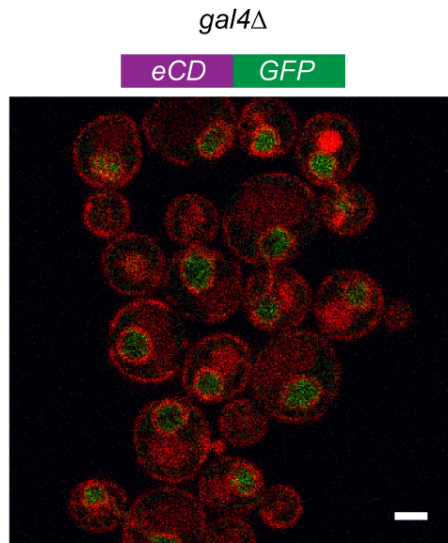

B

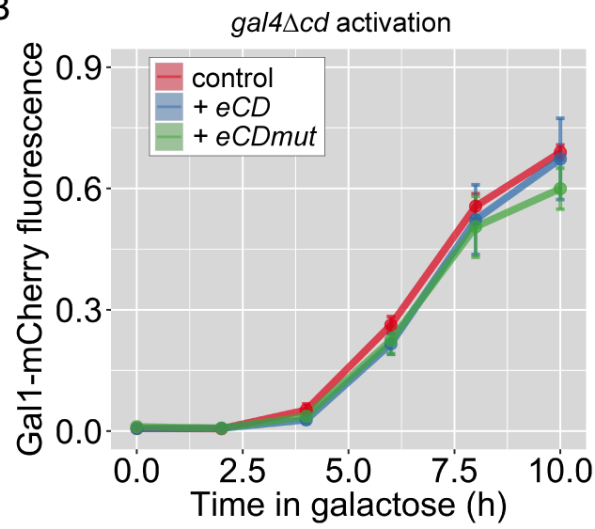

C

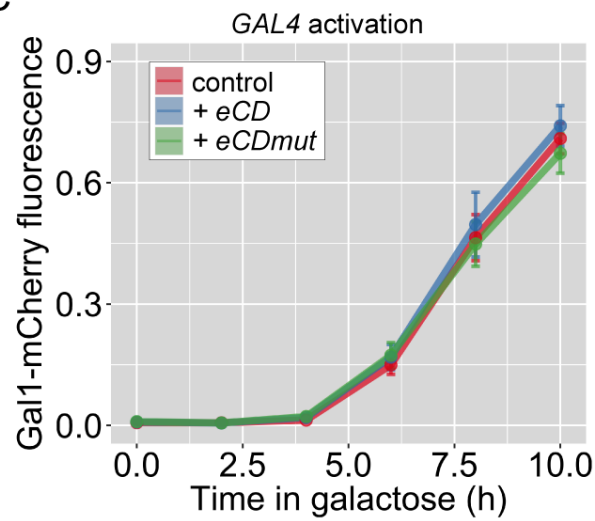

**Figure S5. Localization and function of Gal4 central domain. Related to Figure 5. A.** Confocal micrograph showing localization of GFP fused central domain of Gal4 in *gal4Δ* cells expressing ER/nuclear envelope-targeted RFP. Gal1-mCherry fluorescence relative to CFP control in wild-type cells (**B**) and *gal4Δcd* mutant (**C**), expressing ectopic eCD or mutant eCDmut (L282P). Error bars represent SEM from  $\geq 3$  biological replicates. The yeast strains and the number of biological replicates for all experiments are listed in Table S1 and S2, respectively.



**Table S1. Yeast Strains Used in this Study, Related to Figures 1-5.** The genotype of the strains used for experiments in all the figures are indicated.

| Strain Name                     | Genotype                                                                                                                                       | Figures                    |
|---------------------------------|------------------------------------------------------------------------------------------------------------------------------------------------|----------------------------|
| CRY1                            | <i>MATa ade2-1 can1-100 his3-11,15 leu2-3,112 trp1-1 ura3-1</i>                                                                                | [S3]                       |
| CRY2                            | <i>MATalpha ade2-1 can1-100 his3-11,15 leu2-3,112 trp1-1 ura3-1</i>                                                                            | [S3]                       |
| VSU034                          | <i>MATa ade2-1 can1-100 his3-11,15 leu2-3,112 trp1-1 ura3-1 HO::P-TDH-CFP-NatMX GAL1-mCHERRY:KanMX6</i>                                        | Figure 1, 2, 4, 5, S3 [S4] |
| VSU057                          | <i>MATa ade2-1 can1-100 his3-11,15 leu2-3,112 trp1-1 ura3-1 HO::P-TDH-CFP-NatMX GAL1-mCHERRY:KanMX6 URA3:pADH1pro-GAL1</i>                     | Figure 1, S3, 5 [S4]       |
| VSU060                          | <i>MATa ade2-1 can1-100 his3-11,15 leu2-3,112 trp1-1 ura3-1 HO::P-TDH-CFP-NatMX GAL1-mCHERRY:KanMX6 TRP1:pADH1pro-GAL1</i>                     | Figure 1 [S4]              |
| VSU108                          | <i>MAT alpha ade2-1 can1-100 his3-11,15 leu2-3,112 trp1-1 ura3-1 HO::P-TDH-CFP-NatMX gal1D117V-mCHERRY:HIS3 GAL80-Myc:Trp1</i>                 | Figure 2                   |
| VSU109                          | <i>MATa ade2-1 can1-100 his3-11,15 leu2-3,112 trp1-1 ura3-1 HO::P-TDH-CFP-NatMX GAL1-mCHERRY:KanMX6 GAL80-Myc:Trp1</i>                         | Figure 2                   |
| VSU110                          | <i>MAT alpha ade2-1 can1-100 his3-11,15 leu2-3,112 trp1-1 ura3-1 HO::P-TDH-CFP-NatMX gal1D117V-mCHERRY:HIS3</i>                                | Figure 2, S1               |
| yHMK 65<br>( <i>S. uvarum</i> ) | <i>MATa hoΔ::NatMX</i>                                                                                                                         | Figure 3, S3 [S5]          |
| JRY8153<br>( <i>S. uvarum</i> ) | <i>MATa hoΔ::NatMX his3-11 lys2 trp1-1 ura3-1</i>                                                                                              | Figure 3 [S6]              |
| VSU165<br>( <i>S. uvarum</i> )  | <i>MATa hoΔ::NatMX his3-11 lys2 trp1-1 ura3-1 GAL1-mCHERRY:KanMX6 URA3:pTDH-VENUS</i>                                                          | Figure 3, S3               |
| VSU088                          | <i>MATa ade2-1 can1-100 his3-11,15 leu2-3,112 trp1-1 ura3-1 HO::P-TDH-CFP-NatMX GAL1-mCHERRY:KanMX6 pGAL1::URA3-SUP4-o</i>                     | Figure 3                   |
| VSU155                          | <i>MATa ade2-1 can1-100 his3-11,15 leu2-3,112 trp1-1 ura3-1 HO::P-TDH-CFP-NatMX GAL1-mCHERRY:KanMX6 GAL7-VENUS:URA3</i>                        | Figure 3                   |
| VSU156                          | <i>MATa ade2-1 can1-100 his3-11,15 leu2-3,112 trp1-1 ura3-1 HO::P-TDH-CFP-NatMX PGAL1uvarum GAL1-mCHERRY:KanMX6 GAL7-VENUS:URA3</i>            | Figure 3                   |
| VSU157                          | <i>MATa ade2-1 can1-100 his3-11,15 leu2-3,112 trp1-1 ura3-1 HO::P-TDH-CFP-NatMX PGAL1uvarum GAL1-mCHERRY:KanMX6</i>                            | Figure 3, S2               |
| VSU158                          | <i>MATa ade2-1 can1-100 his3-11,15 leu2-3,112 trp1-1 ura3-1 HO::P-TDH-CFP-NatMX PGAL1uvarum gal1D117V-mCHERRY:KanMX6 GAL7-VENUS:URA3</i>       | Figure 3                   |
| VSU159                          | <i>MATa ade2-1 can1-100 his3-11,15 leu2-3,112 trp1-1 ura3-1 HO::P-TDH-CFP-NatMX GAL1-mCHERRY:KanMX6 gal4ΔCD</i>                                | Figure 4                   |
| VSU170                          | <i>MAT alpha ade2-1 can1-100 his3-11,15 leu2-3,112 trp1-1 ura3-1 HO::P-TDH-CFP-NatMX GAL1-mCHERRY:HIS3 gal4-L282P</i>                          | Figure S4                  |
| VSU164                          | <i>MAT alpha ade2-1 can1-100 his3-11,15 leu2-3,112 trp1-1 ura3-1 HO::P-TDH-CFP-NatMX GAL1-mCHERRY:HIS3 gal4-L282P URA3:pADH1pro-GAL1</i>       | Figure S4                  |
| VSU111                          | <i>MATa ade2-1 can1-100 his3-11,15 leu2-3,112 trp1-1 ura3-1 HO::P-TDH-CFP-NatMX GAL1-mCHERRY:KanMX6 gal4ΔCD TRP1:pADH1pro-GAL1</i>             | Figure 4                   |
| VSU114                          | <i>MATa ade2-1 can1-100 his3-11,15 leu2-3,112 trp1-1 ura3-1 HO::P-TDH-CFP-NatMX GAL1-mCHERRY:KanMX6 gal4ΔCD gal3Δ::HIS3 URA3:pADH1pro-GAL1</i> | Figure 4                   |
| VSU115                          | <i>MATa ade2-1 can1-100 his3-11,15 leu2-3,112 trp1-1 ura3-1 HO::P-TDH-CFP-NatMX GAL1-mCHERRY:KanMX6 gal4ΔCD gal3Δ::HIS3</i>                    | Figure 4                   |
| VSU117                          | <i>MATa ade2-1 can1-100 his3-11,15 leu2-3,112 trp1-1 ura3-1 TRP1:dsRed-HDEL URA3:pADHpro-CDGAL4-GFP</i>                                        | Figure 5                   |
| VSU123                          | <i>MATa ade2-1 can1-100 his3-11,15 leu2-3,112 trp1-1 ura3-1 HO::P-TDH-CFP-</i>                                                                 | Figure 5                   |

|       |                                                                                                                                                                        |           |
|-------|------------------------------------------------------------------------------------------------------------------------------------------------------------------------|-----------|
|       | <i>NatMX GAL1-mCHERRY:KanMX6 TRP1:pADH1pro-GAL1 URA3:pADHpro-CD<sub>GAL4</sub></i>                                                                                     |           |
| VS124 | <i>MATa ade2-1 can1-100 his3-11,15 leu2-3,112 trp1-1 ura3-1 HO::P-TDH-CFP-NatMX GAL1-mCHERRY:KanMX6 TRP1:pADH1pro-GAL1 URA3:pADHpro-CD<sub>GAL4L282P</sub></i>         | Figure 5  |
| VS125 | <i>MATa ade2-1 can1-100 his3-11,15 leu2-3,112 trp1-1 ura3-1 HO::P-TDH-CFP-NatMX GAL1-mCHERRY:KanMX6 gal4ΔCD TRP1:pADH1pro-GAL1 URA3:pADHpro-CD<sub>GAL4</sub></i>      | Figure 5  |
| VS126 | <i>MATa ade2-1 can1-100 his3-11,15 leu2-3,112 trp1-1 ura3-1 HO::P-TDH-CFP-NatMX GAL1-mCHERRY:KanMX6 gal4ΔCD TRP1:pADH1pro-GAL1 URA3:pADHpro-CD<sub>GAL4L282P</sub></i> | Figure 5  |
| VS127 | <i>MATa ade2-1 can1-100 his3-11,15 leu2-3,112 trp1-1 ura3-1 HO::P-TDH-CFP-NatMX GAL1-mCHERRY:KanMX6 URA3:pADHpro-CD<sub>GAL4</sub>-GFP</i>                             | Figure 5  |
| VS128 | <i>MATa ade2-1 can1-100 his3-11,15 leu2-3,112 trp1-1 ura3-1 HO::P-TDH-CFP-NatMX GAL1-mCHERRY:KanMX6 gal4ΔCD URA3:pADHpro-CD<sub>GAL4</sub>-GFP</i>                     | Figure 5  |
| VS129 | <i>MATa ade2-1 can1-100 his3-11,15 leu2-3,112 trp1-1 ura3-1 HO::P-TDH-CFP-NatMX GAL1-mCHERRY:KanMX6 gal4ΔCD TRP1:pADH1pro-GAL1 URA3:pADHpro-CD<sub>GAL4</sub>-GFP</i>  | Figure 5  |
| VS130 | <i>MATa ade2-1 can1-100 his3-11,15 leu2-3,112 trp1-1 ura3-1 HO::P-TDH-CFP-NatMX GAL1-mCHERRY:KanMX6 gal4ΔCD gal80Δ::HIS3 URA3:pADHpro-CD<sub>GAL4</sub></i>            | Figure 5  |
| VS131 | <i>MATa ade2-1 can1-100 his3-11,15 leu2-3,112 trp1-1 ura3-1 HO::P-TDH-CFP-NatMX GAL1-mCHERRY:KanMX6 gal4ΔCD gal80Δ::HIS3 URA3:pADHpro-CD<sub>GAL4L282P</sub></i>       | Figure 5  |
| VS160 | <i>MAT alpha ade2-1 can1-100 his3-11,15 leu2-3,112 trp1-1 ura3-1 HO::P-TDH-CFP-NatMX gal1D117V-mCHERRY:HIS3 URA3:pADH1pro-GAL1</i>                                     | Figure S1 |
| VS161 | <i>MATa ade2-1 can1-100 his3-11,15 leu2-3,112 trp1-1 ura3-1 HO::P-TDH-CFP-NatMX PGAL1HybridA GAL1-mCHERRY:KanMX6</i>                                                   | Figure S2 |
| VS162 | <i>MATa ade2-1 can1-100 his3-11,15 leu2-3,112 trp1-1 ura3-1 HO::P-TDH-CFP-NatMX PGAL1HybridB GAL1-mCHERRY:KanMX6</i>                                                   | Figure S2 |
| VS163 | <i>MATa ade2-1 can1-100 his3-11,15 leu2-3,112 trp1-1 ura3-1 HO::P-TDH-CFP-NatMX PGAL1HybridC GAL1-mCHERRY:KanMX6</i>                                                   | Figure S2 |
| VS132 | <i>MATa ade2-1 can1-100 his3-11,15 leu2-3,112 trp1-1 ura3-1 HO::P-TDH-CFP-NatMX GAL1-mCHERRY:KanMX6 gal80Δ::HIS3</i>                                                   | Figure 4  |
| VS133 | <i>MATa ade2-1 can1-100 his3-11,15 leu2-3,112 trp1-1 ura3-1 HO::P-TDH-CFP-NatMX GAL1-mCHERRY:KanMX6 gal4ΔCD gal80Δ::HIS3</i>                                           | Figure 4  |
| VS136 | <i>MATa ade2-1 can1-100 his3-11,15 leu2-3,112 trp1-1 ura3-1 HO::P-TDH-CFP-NatMX GAL1-mCHERRY:KanMX6 gal4ΔCD-5XSPECTRIN</i>                                             | Figure 4  |
| VS137 | <i>MATa ade2-1 can1-100 his3-11,15 leu2-3,112 trp1-1 ura3-1 HO::P-TDH-CFP-NatMX GAL1-mCHERRY:KanMX6 gal4ΔCD-CDLEU3</i>                                                 | Figure 4  |
| VS138 | <i>MATa ade2-1 can1-100 his3-11,15 leu2-3,112 trp1-1 ura3-1 HO::P-TDH-CFP-NatMX GAL1-mCHERRY:KanMX6 gal4ΔCD-5XSPECTRIN URA3:pADH1pro-GAL1</i>                          | Figure 4  |
| VS139 | <i>MATa ade2-1 can1-100 his3-11,15 leu2-3,112 trp1-1 ura3-1 HO::P-TDH-CFP-NatMX GAL1-mCHERRY:KanMX6 gal4ΔCD-CDLEU3 URA3:pADH1pro-GAL1</i>                              | Figure 4  |
| VS118 | <i>MATa ade2-1 can1-100 his3-11,15 leu2-3,112 trp1-1 ura3-1 TRP1:ER04 URA3:pADHpro-CDgal4-GFP gal4Δ::HIS3</i>                                                          | Figure S5 |
| VS119 | <i>MATa ade2-1 can1-100 his3-11,15 leu2-3,112 trp1-1 ura3-1 HO::P-TDH-CFP-NatMX GAL1-mCHERRY:KanMX6 URA3:pADHpro-CD<sub>GAL4</sub></i>                                 | Figure S5 |
| VS120 | <i>MATa ade2-1 can1-100 his3-11,15 leu2-3,112 trp1-1 ura3-1 HO::P-TDH-CFP-NatMX GAL1-mCHERRY:KanMX6 URA3:pADHpro-CD<sub>GAL4L282P</sub></i>                            | Figure S5 |
| VS121 | <i>MATa ade2-1 can1-100 his3-11,15 leu2-3,112 trp1-1 ura3-1 HO::P-TDH-CFP-</i>                                                                                         | Figure S5 |

|        |                                                                                                                                                     |           |
|--------|-----------------------------------------------------------------------------------------------------------------------------------------------------|-----------|
|        | <i>NatMX GAL1-mCHERRY:KanMX6 gal4ΔCD URA3:pADHpro-CD<sub>GAL4</sub></i>                                                                             |           |
| VSY122 | <i>MATa ade2-1 can1-100 his3-11,15 leu2-3,112 trp1-1 ura3-1 HO::P-TDH-CFP-NatMX GAL1-mCHERRY:KanMX6 gal4ΔCD URA3:pADHpro-CD<sub>GAL4L282P</sub></i> | Figure S5 |
| VSY141 | <i>MATa ade2-1 can1-100 his3-11,15 leu2-3,112 trp1-1 ura3-1 HO::P-TDH-CFP-NatMX pGAL1mikatae GAL1-mCHERRY:KanMX6</i>                                | Figure S2 |
| VSY142 | <i>MATa ade2-1 can1-100 his3-11,15 leu2-3,112 trp1-1 ura3-1 HO::P-TDH-CFP-NatMX pGAL1paradoxus GAL1-mCHERRY:KanMX6</i>                              | Figure S2 |
| VSY200 | <i>MATa ade2-1 can1-100 his3-11,15 leu2-3,112 trp1-1 ura3-1 HO::P-TDH-CFP-NatMX GAL1-mCHERRY:KanMX6 gal4-V864E</i>                                  | Figure 1  |
| VSY201 | <i>MATa ade2-1 can1-100 his3-11,15 leu2-3,112 trp1-1 ura3-1 HO::P-TDH-CFP-NatMX GAL1-mCHERRY:KanMX6 gal4ΔCD-V864E</i>                               | Figure 4  |

All strains are derived from *S. cerevisiae* unless specified

**Table S2. Number of Biological Replicates, Related to Figures 1-5.** The exact number of replicates for the all experiments in each figure panel are indicated.

| Figure Panel      | Experiment (Biological Replicates)                                                                                                                                          |
|-------------------|-----------------------------------------------------------------------------------------------------------------------------------------------------------------------------|
| <b>1B</b>         | ACT (12), REACT (9), ACT+ <i>eGAL1</i> (6)                                                                                                                                  |
| <b>1C</b>         | WT Act (3), <i>gal80Δ</i> (3), <i>gal4-V864E</i> (3)                                                                                                                        |
| <b>1C</b>         | ACT (12), REACT (9), ACT+ <i>eGAL1</i> (6), WT Act (3), <i>gal80Δ</i> (3), <i>gal4-V864E</i> (3)                                                                            |
| <b>1E</b>         | ACT (6), REACT (6), ACT+ <i>eGAL1</i> (6)                                                                                                                                   |
| <b>1F</b>         | ACT (3), REACT (3), ACT+ <i>eGAL1</i> (3)                                                                                                                                   |
| <b>1G</b>         | ACT (5), REACT (5), ACT+ <i>eGAL1</i> (5)                                                                                                                                   |
| <b>1G(inset)</b>  | ACT (3), REACT (3), ACT+ <i>eGAL1</i> (3)                                                                                                                                   |
|                   |                                                                                                                                                                             |
| <b>2B</b>         | <i>GAL1</i> ACT (7), <i>GAL1</i> REACT (5), <i>gal1-D117V</i> ACT (5), <i>gal1-D117V</i> REACT (4)                                                                          |
| <b>2C</b>         | <i>GAL1</i> ACT (6), <i>gal1-D117V</i> ACT (4), <i>gal1-D117V</i> REACT (4), <i>GAL1 gal-&gt;gal</i> (6), <i>gal1D117V gal-&gt;gal</i> (4)                                  |
| <b>2F</b>         | <i>gal1-D117V</i> ACT (4), <i>gal1-D117V</i> REACT (4)                                                                                                                      |
|                   |                                                                                                                                                                             |
| <b>3A</b>         | <i>cerevisiae</i> ACT (12), <i>cerevisiae</i> REACT (9), <i>uvarum</i> ACT (3), <i>uvarum</i> REACT (3)                                                                     |
| <b>3B</b>         | <i>cerevisiae</i> ACT (12), <i>cerevisiae</i> REACT (9), <i>uvarum</i> ACT (3), <i>uvarum</i> REACT (3)                                                                     |
| <b>3C</b>         | ACT (6), REACT (5)                                                                                                                                                          |
| <b>3D</b>         | <i>cerevisiae P<sub>GAL1</sub></i> ACT (6), <i>cerevisiae P<sub>GAL1</sub></i> REACT (6), <i>uvarum P<sub>GAL1</sub></i> ACT (10), <i>uvarum P<sub>GAL1</sub></i> REACT (7) |
| <b>3E</b>         | <i>cerevisiae P<sub>GAL1</sub></i> ACT (4), <i>cerevisiae P<sub>GAL1</sub></i> REACT (4), <i>uvarum P<sub>GAL1</sub></i> ACT (4), <i>uvarum P<sub>GAL1</sub></i> REACT (4)  |
| <b>3F</b>         | <i>cerevisiae P<sub>GAL1</sub></i> (6), <i>uvarum P<sub>GAL1</sub></i> (6)                                                                                                  |
| <b>3F (inset)</b> | <i>cer.</i> (12), <i>uva.</i> (12)                                                                                                                                          |
| <b>3G</b>         | <i>cer. P<sub>GAL1</sub></i> (4), <i>uvar. P<sub>GAL1</sub></i> (4), <i>uvar. P<sub>GAL1 gal1D117V</sub></i> (4)                                                            |
| <b>3H</b>         | <i>cer. P<sub>GAL1</sub></i> (3), <i>uvar. P<sub>GAL1</sub></i> (3), <i>uvar. P<sub>GAL1 gal1D117V</sub></i> (3)                                                            |
| <b>3I</b>         | <i>uvar. P<sub>GAL1</sub></i> (6), <i>uvar. P<sub>GAL1 gal1D117V</sub></i> (6)                                                                                              |
|                   |                                                                                                                                                                             |
| <b>4B</b>         | <i>GAL4</i> ACT (6), <i>GAL4</i> REACT (5), <i>gal4Δcd</i> ACT (4), <i>gal4Δcd</i> REACT (4)                                                                                |
| <b>4C</b>         | WT REACT (9), <i>gal4-5X spectrin</i> ACT (4), <i>gal4-5X spectrin</i> REACT (4), <i>gal4-5X spectrin +eGAL1</i> (4)                                                        |
| <b>4D</b>         | WT REACT (9), <i>gal4-LEU3CD</i> ACT (4), <i>gal4-LEU3CD</i> REACT (4), <i>gal4-LEU3CD +eGAL1</i> (4)                                                                       |
| <b>4E</b>         | <i>GAL4 +eGAL1</i> (6), <i>gal4Δcd</i> (4), <i>gal4Δcd gal3Δ+eGAL1</i> (4), <i>gal3Δ</i> (3), <i>gal4Δcd gal3Δ</i> (3)                                                      |
| <b>4F</b>         | <i>gal4Δcd</i> (3), <i>gal4Δcd gal80Δ</i> (3), <i>gal4Δcd-V864E</i> (3)                                                                                                     |
| <b>4G</b>         | <i>gal4Δcd</i> ACT (4), <i>gal4Δcd</i> REACT (4), <i>gal4Δcd +eGAL1</i> (4), <i>gal4Δcd</i> (3), <i>gal4Δcd gal80Δ</i> (3), <i>gal4Δcd-V864E</i> (3)                        |
|                   |                                                                                                                                                                             |
| <b>5C</b>         | <i>gal4Δcd</i> (10), <i>gal4Δcd +eCD</i> (3), <i>gal4Δcd +eCD + eGAL1</i> (7), <i>gal4Δcd eCDmut + eGAL1</i> (7)                                                            |
| <b>5D</b>         | <i>gal4Δcd</i> (10), <i>gal4Δcd gal80Δ</i> (19), <i>gal4Δcd gal80Δ</i> (10), <i>gal4Δcd gal80Δ</i>                                                                          |

|            |                                                                                                            |
|------------|------------------------------------------------------------------------------------------------------------|
|            | (10)                                                                                                       |
| <b>5E</b>  | <i>gal4Δcd</i> (4), <i>gal4Δcd + eGAL1</i> (5), <i>GAL4</i> (3), <i>gal4Δcd + eCDmut</i> (3)               |
| <b>5F</b>  | <i>GAL4 +eGAL1</i> (3), <i>GAL4 +eGAL1 +eCD</i> (3), <i>GAL4 +eGAL1 +eCDmut</i> (3)                        |
|            |                                                                                                            |
| <b>S1B</b> | <i>GAL1</i> (3), <i>gal1-D117V</i> (3)                                                                     |
| <b>S1C</b> | <i>GAL1</i> (4), <i>gal1-D117V</i> (4)                                                                     |
| <b>S1D</b> | <i>GAL1</i> (6), <i>gal1-D117V</i> (4)                                                                     |
|            |                                                                                                            |
| <b>S2B</b> | <i>S. uvarum</i> ACT (3), <i>S. uvarum</i> REACT (3)                                                       |
| <b>S2D</b> | <i>P<sub>GAL1</sub> cerevisiae</i> (5), <i>uvarum</i> (3), hybrid A (7), hybrid B (7), hybrid C(7)         |
| <b>S2E</b> | <i>P<sub>GAL1</sub> cerevisiae</i> (9), <i>uvarum</i> (9), hybrid A (9), hybrid B (9), hybrid C(9)         |
| <b>S2F</b> | <i>P<sub>GAL1</sub> cerevisiae</i> (5), <i>mikatae</i> (6), <i>paradoxus</i> (4)                           |
| <b>S2G</b> | <i>P<sub>GAL1</sub> cerevisiae</i> (6), <i>mikatae</i> (9), <i>paradoxus</i> (6)                           |
|            |                                                                                                            |
| <b>S3A</b> | <i>uvarum</i> glucose (4), glu + gal (5)                                                                   |
| <b>S3B</b> | <i>cerevisiae</i> ACT (3), ACT + <i>eGAL1</i> (3)                                                          |
| <b>S3C</b> | Exp1(4), Exp2 (2)                                                                                          |
|            |                                                                                                            |
| <b>S4A</b> | <i>GAL4</i> ACT (12), <i>gal4-L282P</i> ACT (5), <i>gal4-L282P</i> REACT (5), <i>gal4-L282P +eGAL1</i> (3) |
| <b>S4B</b> | <i>GAL4</i> (7), <i>GAL4 +eGAL1</i> (4), <i>gal4Δcd</i> (4), <i>gal4Δcd +eGAL1</i> (4)                     |
| <b>S4C</b> | All (3)                                                                                                    |
| <b>S4D</b> | All (3)                                                                                                    |
| <b>S4E</b> | <i>GAL4</i> ACT (12), <i>GAL4</i> REACT (9), <i>gal4Δcd</i> ACT (4), <i>gal4Δcd</i> REACT (4)              |
|            |                                                                                                            |
| <b>S5B</b> | <i>gal4Δcd</i> (3), <i>gal4Δcd +eCD</i> (3), <i>gal4Δcd + eCDmut</i> (4)                                   |
| <b>S5C</b> | <i>GAL4</i> (3), <i>GAL4 + eCD</i> (3), <i>GAL4 + eCDmut</i> (4)                                           |

## Supplemental References

- S1. Mortimer RK (2000) Evolution and variation of the yeast (*Saccharomyces*) genome. *Genome Res* 10: 403-409.
- S2. Hittinger, C.T., and Carroll, S.B. (2007). Gene duplication and the adaptive evolution of a classic genetic switch. *Nature* 449, 677-681.
- S3. Brickner, J.H., and Fuller, R.S. (1997). SOI1 encodes a novel, conserved protein that promotes TGN-endosomal cycling of Kex2p and other membrane proteins by modulating the function of two TGN localization signals. *The Journal of cell biology* 139, 23-36.
- S4. Sood, V., Cajigas, I., D'Urso, A., Light, W.H., and Brickner, J.H. (2017). GAL gene epigenetic transcriptional memory in *Saccharomyces cerevisiae* depends on growth in glucose and the Tup1 transcription factor. Submitted.
- S5. Scannell, D.R., Zill, O.A., Rokas, A., Payen, C., Dunham, M.J., Eisen, M.B., Rine, J., Johnston, M., and Hittinger, C.T. (2011). The Awesome Power of Yeast Evolutionary Genetics: New Genome Sequences and Strain Resources for the *Saccharomyces sensu stricto* Genus. *G3* 1, 11-25.
- S6. Gallagher, J.E., Babiarz, J.E., Teytelman, L., Wolfe, K.H., and Rine, J. (2009). Elaboration, diversification and regulation of the Sir1 family of silencing proteins in *Saccharomyces*. *Genetics* 181, 1477-1491.
